# Supplementary material for: Identification of Green-Leaf Volatiles Released from Cabbage Palms (Sabal palmetto) Infected with the Lethal Bronzing Phytoplasma
Source: MDPI journal article supplement (doi:10.3390/plants12112164), 2023-05-30
Supplement: s1 [file s1]

**Supplementary Table S3.** GLVs concentrations of cabbages palms in close proximity (*NIT*) to lethal bronzing infected palms.

| Palm ID | Hexanal              | E-2-hexenal          | 3-hexenal             | Z-3-hexenol          | 1-hexanol            |
|---------|----------------------|----------------------|-----------------------|----------------------|----------------------|
| Spa_4   | 1E+6<br>(±0.000000)  | 2E+5<br>(±0.00000)   | 4E+6<br>(±0.000000)   | 2E+7<br>(±0.0000000) | 4E+6<br>(±0.000000)  |
| Spa_5   | 3E+6<br>(±0.000000)  | 4E+5<br>(±0.00000)   | 9E+6<br>(±0.000000)   | 3E+7<br>(±0.0000000) | 7E+6<br>(±0.000000)  |
| Spa_7   | 3E+7<br>(±0.0000000) | 2E+7<br>(±0.0000000) | No Detection          | 2E+7<br>(±0.0000000) | 1E+7<br>(±0.0000000) |
| Spa_8   | 1E+7<br>(±0.0000000) | 2E+6<br>(±0.000000)  | 2E+7<br>(±0.0000000)  | 3E+7<br>(±0.0000000) | 1E+7<br>(±0.0000000) |
| Spa_10  | 6E+7<br>(±0.0000000) | 1E+7<br>(±0.0000000) | 1E+8<br>(±0.00000000) | 3E+7<br>(±0.0000000) | 8E+6<br>(±0.000000)  |
| Spa_11  | 9E+6<br>(±0.000000)  | 5E+6<br>(±0.000000)  | 3E+7<br>(±0.0000000)  | 2E+7<br>(±0.0000000) | 8E+6<br>(±0.000000)  |
| Spa_12  | 3E+6<br>(±0.000000)  | 2E+4 (±0.0000)       | 9E+5 (±0.00000)       | 8E+6<br>(±0.000000)  | 2E+6<br>(±0.000000)  |
| Spa_13  | 7E+5 (±0.00000)      | 6E+4 (±0.0000)       | 5E+6<br>(±0.000000)   | 1E+7<br>(±0.0000000) | 2E+6<br>(±0.000000)  |
| Spa_14  | 1E+6<br>(±0.000000)  | 2E+5<br>(±0.00000)   | 1E+7<br>(±0.0000000)  | 2E+7<br>(±0.0000000) | 4E+6<br>(±0.000000)  |
| Spa_17  | No Detection         | 1E+6<br>(±0.000000)  | 3E+7<br>(±0.0000000)  | 6E+7<br>(±0.0000000) | 2E+7<br>(±0.0000000) |
| Spa_18  | 6E+6<br>(±0.000000)  | 3E+5<br>(±0.00000)   | 1E+7<br>(±0.0000000)  | 2E+7<br>(±0.0000000) | 7E+5 (±0.00000)      |
| Spa_19  | 2E+6<br>(±0.000000)  | 9E+4 (±0.0000)       | 2E+7<br>(±0.0000009)  | 3E+7<br>(±0.0000000) | 1E+7<br>(±0.0000000) |
| Spa_20  | 3E+6<br>(±0.000000)  | 3E+5<br>(±0.00000)   | 7E+6<br>(±0.000000)   | 3E+7<br>(±0.0000000) | 8E+6<br>(±0.000000)  |
| Spa_21  | 1E+7<br>(±0.0000000) | 1E+6<br>(±0.000000)  | 2E+7<br>(±0.0000000)  | 6E+7<br>(±0.0000000) | 3E+7<br>(±0.0000000) |
| Spa_22  | 4E+4 (±0.0000)       | 4E+5<br>(±0.00000)   | 8E+6<br>(±0.000000)   | 5E+7<br>(±0.0000000) | 9E+6<br>(±0.000000)  |
