# Supplementary material for: Identification of Green-Leaf Volatiles Released from Cabbage Palms (Sabal palmetto) Infected with the Lethal Bronzing Phytoplasma
Source: MDPI journal article supplement (doi:10.3390/plants12112164), 2023-05-30
Supplement: s1 [file s1]

**Supplementary Table S4.** GLVs concentrations of non-infected and non-threatened (*N/NT*) cabbage palms.

| Replicates ID | 3-hexenal    | hexenal                     | 2-E-hexenal                | Z-3-hexenol                 | 1-hexanol                   |
|---------------|--------------|-----------------------------|----------------------------|-----------------------------|-----------------------------|
| Spa_2         | No Detection | 1E+6<br>( $\pm 0.000000$ )  | 8E+03 ( $\pm 0.000$ )      | 7E+4 ( $\pm 0.0000$ )       | 3E+4 ( $\pm 0.0000$ )       |
| Spa_6         | No Detection | 3E+6<br>( $\pm 0.000000$ )  | 6E+5 ( $\pm 0.00000$ )     | 3E+7<br>( $\pm 0.0000000$ ) | 7E+6<br>( $\pm 0.000000$ )  |
| Spa_9         | No Detection | 2E+6<br>( $\pm 0.000000$ )  | 5E+6<br>( $\pm 0.000000$ ) | 2E+7<br>( $\pm 0.0000000$ ) | 2E+6<br>( $\pm 0.000000$ )  |
| Spa_15        | No Detection | 2E+7<br>( $\pm 0.0000000$ ) | 2E+6<br>( $\pm 0.000000$ ) | 5E+7<br>( $\pm 0.0000000$ ) | 1E+7<br>( $\pm 0.0000000$ ) |
| Spa_16        | No Detection | 6E+4 ( $\pm 0.0000$ )       | 1E+4 ( $\pm 0.0000$ )      | 6E+6<br>( $\pm 0.000000$ )  | 6E+5 ( $\pm 0.00000$ )      |
