# Supplementary material for: Identification of Green-Leaf Volatiles Released from Cabbage Palms (Sabal palmetto) Infected with the Lethal Bronzing Phytoplasma
Source: MDPI journal article supplement (doi:10.3390/plants12112164), 2023-05-30
Supplement: s1 [file s1]

**Supplementary Table S2.** Green leaf volatile average ( $\pm$ SE) concentrations (GC/MassSpec Counts) from infected (/) palms.

| Palm ID | Hexanal                    | 2-Hexenal                  | cis-3-Hexen-1-ol           | 1-Hexanol                  |
|---------|----------------------------|----------------------------|----------------------------|----------------------------|
| Spa_1   | 8E+7<br>( $\pm$ 0.0000000) | 8E+7<br>( $\pm$ 0.0000000) | 1E+6<br>( $\pm$ 0.0000000) | 1E+5 ( $\pm$ 0.000000)     |
| Spa_3   | 4E+7<br>( $\pm$ 0.0000000) | 4E+7<br>( $\pm$ 0.0000000) | 2E+7<br>( $\pm$ 0.0000000) | 2E+7<br>( $\pm$ 0.0000000) |
