# Supplementary material for: Identification of Green-Leaf Volatiles Released from Cabbage Palms (Sabal palmetto) Infected with the Lethal Bronzing Phytoplasma
Source: MDPI journal article supplement (doi:10.3390/plants12112164), 2023-05-30
Supplement: s1 [file s1]

**Supplementary Table S1.** Volatiles released from *S. palmetto* leaves

| <b>Threatened</b>                  |                                                    | <b>Infected</b>                    |                                    | <b>No Bacteria/threat</b>          |                                   |
|------------------------------------|----------------------------------------------------|------------------------------------|------------------------------------|------------------------------------|-----------------------------------|
| <i>Retention</i><br><i>n times</i> | <i>Compounds</i>                                   | <i>Retention</i><br><i>n times</i> | <i>Compounds</i>                   | <i>Retention</i><br><i>n times</i> | <i>Compounds</i>                  |
| 3.1228                             | Furan, 2-ethyl-                                    | 3.123                              | Furan, 2-ethyl-                    | 3.2775                             | Acetoin                           |
| 3.2412                             | 2-Pentenal, (E)-                                   | 3.2466                             | Acetoin                            | 3.3115                             | 2,4-Dimethylfuran                 |
| 3.2729                             | Acetoin                                            | 3.5319                             | 2-Pentenal, 2-methyl-              | 3.6827                             | 1-Butanol, 3-methyl-              |
| 3.5313                             | 2-Butenal, 2-ethyl-                                | 3.6851                             | 1-Butanol, 3-methyl-               | 3.7498                             | Butyl isocyanatoacetate           |
| 3.6876                             | 1-Butanol, 3-methyl-                               | 3.8657                             | 2-Pentenal, (E)-                   | 4.2768                             | Toluene                           |
| 3.8686                             | 2-Pentenal, (E)-                                   | 3.9605                             | (S)-5-Hydroxymethyl-2[5H]-furanone | 4.3137                             | 1-Pentanol                        |
| 3.9671                             | (S)-5-Hydroxymethyl-2[5H]-furanone                 | 4.0426                             | 2-Pentenal, (E)-                   | 4.391                              | 2-Penten-1-ol, (Z)-               |
| 4.0523                             | 2-Pentenal, (E)-                                   | 4.2819                             | Toluene                            | 4.9969                             | Furan, 2-methoxy-                 |
| 4.3038                             | Cyclobutanone, 2,2,3-trimethyl-                    | 4.3056                             | Cyclobutanone, 2,2,3-trimethyl-    | 5.0145                             | Hexanal                           |
| 4.3745                             | 2-Penten-1-ol, (Z)-                                | 4.3739                             | 2-Penten-1-ol, (Z)-                | 5.9146                             | Difluoroisocyanatophosphine       |
| 4.7933                             | 1-Octene                                           | 4.7971                             | 2-Octene                           | 6.1736                             | 2-Pentanone, 4-hydroxy-4-methyl-  |
| 5.0006                             | 3-Hexenal                                          | 5.0475                             | Hexanal                            | 6.4102                             | 2-Hexenal, (E)-                   |
| 5.5675                             | Butanoic acid, 3-methyl-, 3-methyl-3-butenyl ester | 5.7106                             | Formic acid, pentyl ester          | 6.4819                             | 3-Hexen-1-ol, (Z)-                |
| 5.7056                             | Formic acid, pentyl ester                          | 5.9327                             | Hexane, 3,3,4-trimethyl-           | 6.5975                             | Ethylbenzene                      |
| 6.1045                             | 3,3-Diethoxy-1-propyne                             | 6.2027                             | 2-Hexenal, (E)-                    | 6.6687                             | Heptane, 2,4-dimethyl-            |
| 6.1869                             | 2-Hexenal, (E)-                                    | 6.453                              | 2-Hexenal, (E)-                    | 6.8144                             | p-Xylene                          |
| 6.3765                             | 2-Hexenal, (E)-                                    | 6.523                              | 3-Hexen-1-ol, (Z)-                 | 6.8525                             | 1-Hexanol                         |
| 6.5673                             | 3-Hexen-1-ol, (Z)-                                 | 6.877                              | 1-Hexanol                          | 7.4889                             | Benzene, 1,3-dimethyl-            |
| 6.8178                             | Benzene, 1,3-dimethyl-                             | 7.4911                             | p-Xylene                           | 7.7069                             | Nonane                            |
| 6.8859                             | 1-Hexanol                                          | 7.7645                             | Heptanal                           | 7.7754                             | Hexanal, 3-methyl-                |
| 7.7631                             | Heptanal                                           | 7.8673                             | Oxime-, methoxy-phenyl-            | 7.8681                             | Oxime-, methoxy-phenyl-           |
| 7.8468                             | Oxime-, methoxy-phenyl-                            | 7.9938                             | 2,4-Hexadienal, (E,E)-             | 8.2146                             | Anisole                           |
| 8.0057                             | 2,4-Hexadienal, (E,E)-                             | 8.1211                             | Butanoic acid, 4-hydroxy-          | 9.5399                             | Octane, 2,2,6-trimethyl-          |
| 8.3374                             | 3-Hexen-1-ol, formate, (Z)-                        | 8.3431                             | Ethyl (Z)-hex-3-enyl carbonate     | 10.0588                            | Pentanoic acid                    |
| 8.5703                             | Formic acid, hexyl ester                           | 8.5758                             | Formic acid, hexyl ester           | 10.3055                            | Hexanethioic acid, S-methyl ester |

|         |                                                         |         |                                                   |         |                                                         |
|---------|---------------------------------------------------------|---------|---------------------------------------------------|---------|---------------------------------------------------------|
| 8.7055  | (1R)-2,6,6-Trimethylbicyclo[3.1.1]hept-2-ene            | 8.7103  | (1R)-2,6,6-Trimethylbicyclo[3.1.1]hept-2-ene      | 10.3953 | 5-Hepten-2-one, 6-methyl-                               |
| 9.0643  | Furan, 2-butyltetrahydro-                               | 9.4311  | 2-Heptenal, (E)-                                  | 10.5425 | Mesitylene                                              |
| 9.288   | Oxalic acid, cyclohexyl butyl ester                     | 9.5186  | Benzaldehyde                                      | 10.762  | Decane                                                  |
| 9.5133  | Benzaldehyde                                            | 9.533   | (E)-4-Oxohex-2-enal                               | 10.8718 | Octanal                                                 |
| 9.523   | (E)-4-Oxohex-2-enal                                     | 9.8618  | 2-Octene                                          | 10.9417 | 3-Heptene, 2,2,4,6,6-pentamethyl-                       |
| 9.8515  | 2-Octene                                                | 10.1414 | 1-Octen-3-ol                                      | 11.3185 | 4-Cyanocyclohexene                                      |
| 10.0141 | Bicyclo[3.1.1]heptane, 6,6-dimethyl-2-methylene-, (1S)- | 10.2047 | Pentanoic acid                                    | 11.5029 | Pentane, 2,2,4-trimethyl-                               |
| 10.1288 | 1-Octen-3-ol                                            | 10.3003 | n-Caproic acid vinyl ester                        | 11.6378 | D-Limonene                                              |
| 10.3821 | 5-Hepten-2-one, 6-methyl-                               | 10.3756 | 3-Octanone                                        | 11.755  | 3-Heptene, 2,2,4,6,6-pentamethyl-                       |
| 10.4697 | 2-Hexenal, (E)-                                         | 10.5125 | Furan, 2-pentyl-                                  | 12.1075 | Benzeneacetaldehyde                                     |
| 10.754  | Decane                                                  | 10.6665 | 2,4-Heptadienal, (E,E)-                           | 12.4909 | Disulfide, bis(1,1,3,3-tetramethylbutyl)                |
| 10.86   | Octanal                                                 | 10.7602 | Octane, 2,5-dimethyl-                             | 12.7184 | Sulfurous acid, 2-ethylhexyl hexyl ester                |
| 11.0007 | 3-Hexen-1-ol, acetate, (Z)-                             | 10.8686 | Octanal                                           | 12.8001 | Ethanone, 2-(formyloxy)-1-phenyl-                       |
| 11.2959 | Cyclohexen-1-carbonitrile                               | 11.0977 | Furan, 2-propyl-                                  | 13.3896 | Benzene, 1-ethenyl-4-ethyl-                             |
| 11.6279 | D-Limonene                                              | 11.7959 | 1,2-Propanediol, 1-phenyl-                        | 13.6712 | Heptane, 4-methyl-                                      |
| 11.7837 | 1,2-Propanediol, 1-phenyl-                              | 11.8779 | (E)-4-Oxohex-2-enal                               | 13.8192 | Undecane                                                |
| 11.8645 | (E)-4-Oxohex-2-enal                                     | 12.1036 | Benzeneacetaldehyde                               | 13.8977 | Octane, 5-ethyl-2-methyl-                               |
| 12.4373 | 2(3H)-Furanone, 5-ethyldihydro-                         | 12.5804 | 2-Pentene, 1-ethoxy-4-methyl-, (Z)-               | 13.9656 | Nonanal                                                 |
| 12.566  | 2H-Pyran-2-methanol, tetrahydro-                        | 12.7125 | Hexane, 2,2,5,5-tetramethyl-                      | 14.2565 | Naphthalene, 1,2-dihydro-                               |
| 12.7828 | Acetophenone                                            | 12.8011 | Benzoic acid, (4-benzoyloxy-2-chlorophenyl) ester | 14.629  | Undecane, 3,7-dimethyl-                                 |
| 12.9382 | Formic acid, octyl ester                                | 12.8487 | Bicyclo[4.2.0]octa-1,3,5-trien-7-ol               | 15.5217 | 2-Oxo-4-phenyl-6-(4-chlorophenyl)-1,2-dihydropyrimidine |
| 13.37   | Benzene, 1-ethenyl-4-ethyl-                             | 13.3793 | Benzene, 1-ethenyl-3-ethyl-                       | 15.5912 | Undecane, 4-methyl-                                     |

|         |                                                |         |                                          |         |                                          |
|---------|------------------------------------------------|---------|------------------------------------------|---------|------------------------------------------|
| 13.5956 | Benzene, 1-ethenyl-4-ethyl-                    | 13.6032 | Benzene, 1-ethenyl-4-ethyl-              | 15.7043 | Benzaldehyde, 3-ethyl-                   |
| 13.9537 | Nonanal                                        | 13.9641 | Nonanal                                  | 15.7166 | Dodecane, 5-methyl-                      |
| 14.7821 | Benzene, 1,1'-(1,5-hexadiene-1,6-diyl)bis-     | 14.6292 | Undecane, 4,7-dimethyl-                  | 15.9091 | Undecane, 3-methyl-                      |
| 15.4713 | Undecane, 5-methyl-                            | 15.3789 | Benzene, 1-ethenyl-4-methoxy-            | 16.1446 | Benzaldehyde, 4-ethyl-                   |
| 15.6916 | Benzaldehyde, 3-ethyl-                         | 15.4131 | 2,6-Nonadienal, (E,Z)-                   | 16.2447 | Cinnamaldehyde, (E)-                     |
| 15.7065 | Nonane, 5-(2-methylpropyl)-                    | 15.5931 | Undecane, 4-methyl-                      | 16.27   | Naphthalene                              |
| 16.1323 | Benzaldehyde, 4-ethyl-                         | 15.699  | Benzaldehyde, 4-ethyl-                   | 16.7339 | Cinnamaldehyde, (E)-                     |
| 16.2322 | Cinnamaldehyde, (E)-                           | 15.7159 | Nonane, 5-butyl-                         | 16.7642 | Dodecane                                 |
| 16.2759 | 1-(1-Methoxypropan-2-yloxy)propan-2-yl acetate | 15.9081 | Undecane, 3-methyl-                      | 16.9409 | Decanal                                  |
| 16.3846 | Butanoic acid, 3-hexenyl ester, (Z)-           | 16.1403 | Benzaldehyde, 4-ethyl-                   | 17.1608 | Undecane, 3,6-dimethyl-                  |
| 16.6186 | Methyl salicylate                              | 16.2399 | Cinnamaldehyde, (E)-                     | 17.3237 | Ethanol, 2-phenoxy-                      |
| 16.7212 | Cinnamaldehyde, (E)-                           | 16.5256 | Cyclopentane, 1,2,3-trimethyl-           | 17.5565 | Isophthalaldehyde                        |
| 16.7549 | Dodecane                                       | 16.6264 | Methyl salicylate                        | 17.7661 | Isophthalaldehyde                        |
| 16.9327 | Decanal                                        | 16.7289 | Cinnamaldehyde, (E)-                     | 18.103  | 1H-Indene-4-carboxaldehyde, 2,3-dihydro- |
| 17.5468 | 1,4-Benzenedicarboxaldehyde                    | 16.761  | Dodecane                                 | 18.5719 | m-Ethylacetophenone                      |
| 17.7586 | Isophthalaldehyde                              | 16.9393 | Decanal                                  | 18.7005 | 1H-Indene, 1-ethyl-2,3-dihydro-          |
| 18.087  | 1H-Indene-4-carboxaldehyde, 2,3-dihydro-       | 17.5551 | Isophthalaldehyde                        | 18.8086 | Undecane, 6,6-dimethyl-                  |
| 18.5626 | m-Ethylacetophenone                            | 17.7646 | Isophthalaldehyde                        | 19.1466 | 3-Buten-2-one, 4-phenyl-                 |
| 18.6907 | 1H-Indene, 1-ethyl-2,3-dihydro-                | 17.9454 | Cyclopentane, butyl-                     | 19.3273 | 1-Undecanol                              |
| 19.1387 | 3-Buten-2-one, 4-phenyl-                       | 18.0975 | 1H-Indene-4-carboxaldehyde, 2,3-dihydro- | 19.6201 | p-Isopropenylphenol                      |
| 19.321  | 1-Decanol                                      | 18.5718 | Ethanone, 1-(4-ethylphenyl)-             | 19.9636 | Phthalic anhydride                       |
| 20.5051 | Ethanone, 1-(2,4-dimethylphenyl)-              | 18.6989 | 1H-Indene, 1-ethyl-2,3-dihydro-          | 20.691  | Heptylcyclohexane                        |

|         |                                                                  |         |                                                 |         |                                                 |
|---------|------------------------------------------------------------------|---------|-------------------------------------------------|---------|-------------------------------------------------|
| 20.6847 | Heptylcyclohexane                                                | 19.0876 | Ethanone, 1-(4-ethylphenyl)-                    | 20.9786 | Sulfurous acid, cyclohexylmethyl isobutyl ester |
| 20.9733 | Sulfurous acid, cyclohexylmethyl heptadecyl ester                | 19.146  | 3-Buten-2-one, 4-phenyl-                        | 21.1253 | 4'-Methylpropiophenone                          |
| 21.1199 | 4'-Methylpropiophenone                                           | 19.3249 | 1-Undecanol                                     | 21.364  | 4-Benzyloxybenzonitrile                         |
| 21.5379 | Propanoic acid, 2-methyl-, 3-hydroxy-2,2,4-trimethylpentyl ester | 19.6191 | p-Isopropenylphenol                             | 22.302  | Nonane, 5-methyl-5-propyl-                      |
| 22.1902 | Hexane, 2,4,4-trimethyl-                                         | 19.9653 | 1,2-Benzenedicarboxylic acid                    | 23.9667 | Decane, 1-chloro-                               |
| 23.5815 | 4-Methylene-3,4-dihydroisocoumarin                               | 20.5141 | Ethanone, 1-(3,4-dimethylphenyl)-               | 25.0178 | 1-Heptadecyne                                   |
| 23.6134 | Dimethyl phthalate                                               | 20.9781 | Sulfurous acid, cyclohexylmethyl isobutyl ester | 27.3208 | Pentadecanal-                                   |
| 27.074  | 2,2,4-Trimethyl-1,3-pentanediol diisobutyrate                    | 21.1292 | 4'-Methylpropiophenone                          | 28.4333 | Dodecane, 1-chloro-                             |
| 27.3168 | 1,14-Tetradecanediol                                             | 23.0617 | 1(3H)-Isobenzofuranone, 3,3-dimethyl-           | 29.6692 | Tetradecanoic acid                              |
| 28.8034 | Carbonic acid, nonyl prop-1-en-2-yl ester                        | 27.3203 | Z-2-Dodecenol                                   | 30.97   | Pentadecanoic acid                              |
| 29.0432 | Pentadecanal-                                                    | 28.4356 | 1-Chloroundecane                                | 31.1572 | Phthalic acid, isobutyl 4-octyl ester           |
| 31.1526 | 1,2-Benzenedicarboxylic acid, bis(2-methylpropyl) ester          | 29.0476 | Pentadecanal-                                   | 32.1338 | n-Hexadecanoic acid                             |
| 31.4159 | Homosalate                                                       | 29.6638 | Tetradecanoic acid                              | 32.2359 | Phthalic acid, butyl cyclobutyl ester           |
| 32.1223 | n-Hexadecanoic acid                                              | 31.1571 | Phthalic acid, cyclohexyl isohexyl ester        | 34.4183 | Phenol, 4,4'-(1-methylethylidene)bis-           |
|         |                                                                  | 32.1258 | n-Hexadecanoic acid                             |         |                                                 |
|         |                                                                  | 32.2363 | Phthalic acid, butyl cyclobutyl ester           |         |                                                 |
|         |                                                                  | 34.4187 | Phenol, 4,4'-(1-methylethylidene)bis-           |         |                                                 |
